# Supplementary material for: Anti-inflammatory effects of Morus alba Linne bark on the activation of toll-like receptors and imiquimod-induced ear edema in mice
Source: PubMed Central journal article supplement (PMC8033707; doi:10.1186/s12906-021-03291-5), 2021-04-09
Supplement: 12906_2021_3291_MOESM1_ESM.pdf [file 12906_2021_3291_MOESM1_ESM.pdf]

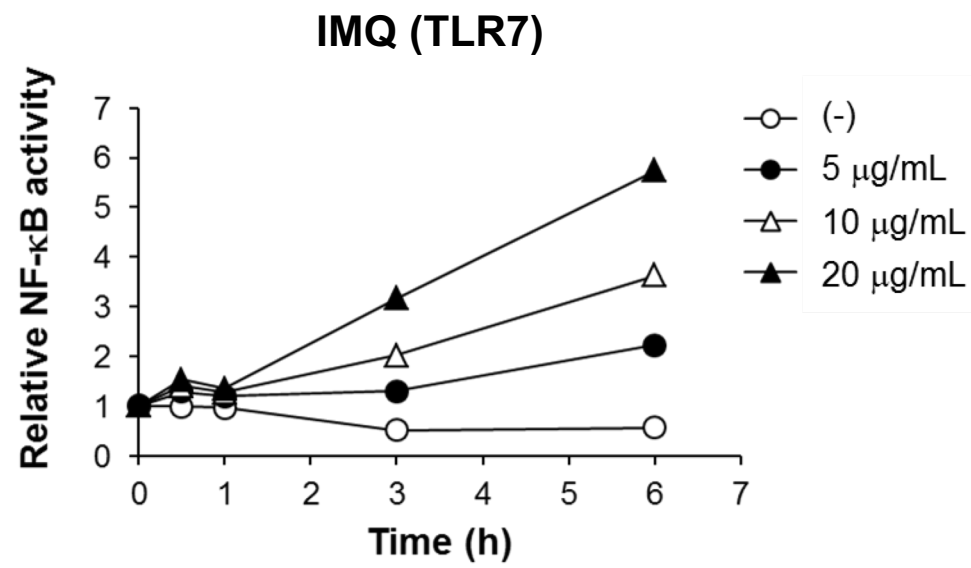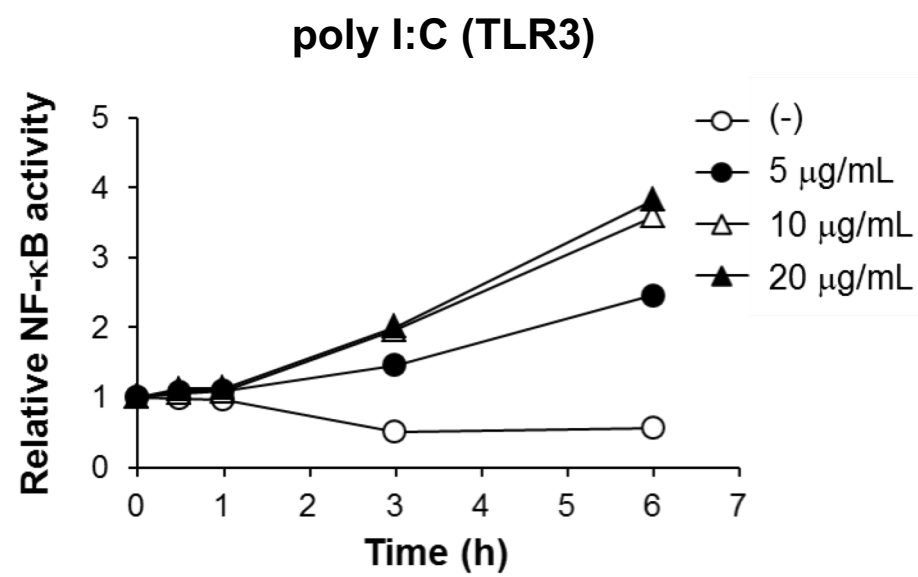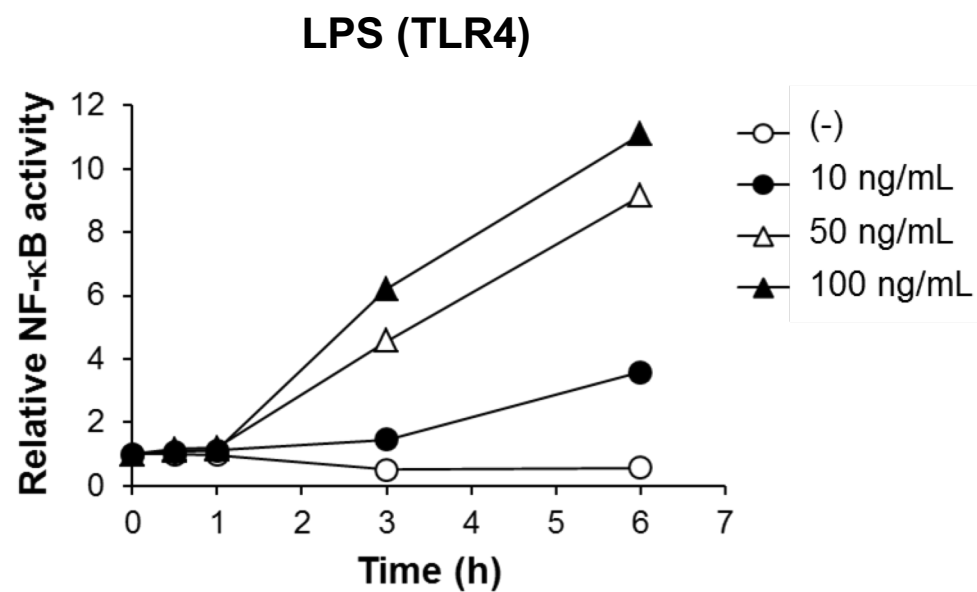

**Supplementary Figure 1.**

**Response of RAW264.7-NFκB-Luc2 cells to different TLR ligands.**

TLR stimulation-induced activation of the NF-κB pathway in RAW264.7-NFκB-Luc2 cells. Cells ( $5 \times 10^4$  cells/well) were seeded onto 96-well plates and stimulated with IMQ, polyI:C or LPS for 0-6 hours. Luciferase activity was measured at the indicated time and the relative activity compared with untreated control cells was measured.

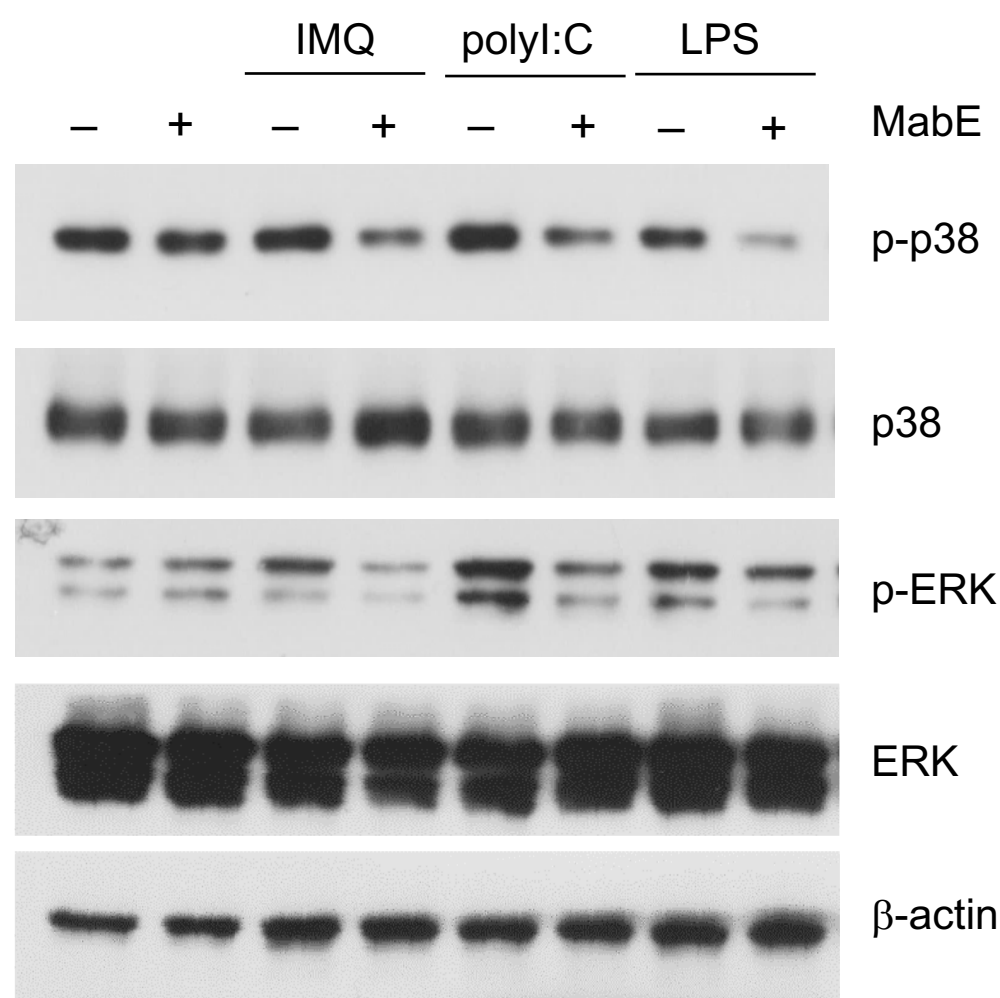

**Supplementary Figure 2.**

**MabE inhibits the TLR ligand-induced activation of MAPK signals in RAW264.7 cells.**

RAW264.7 cells ( $10^6$  cells/well) were seeded onto 6-well plates and pretreated with MabE (25 mg/mL) or culture medium. After 1 hour, they were stimulated with each TLR ligands (IMQ: 20 mg/mL, polyI:C: 20 mg/mL or LPS: 100 ng/mL) for 3 hours. Equal amounts of protein in cell lysates were analyzed by Western blotting. The  $\beta$ -actin protein levels were used to confirm that equal amounts of protein were subjected to electrophoresis.

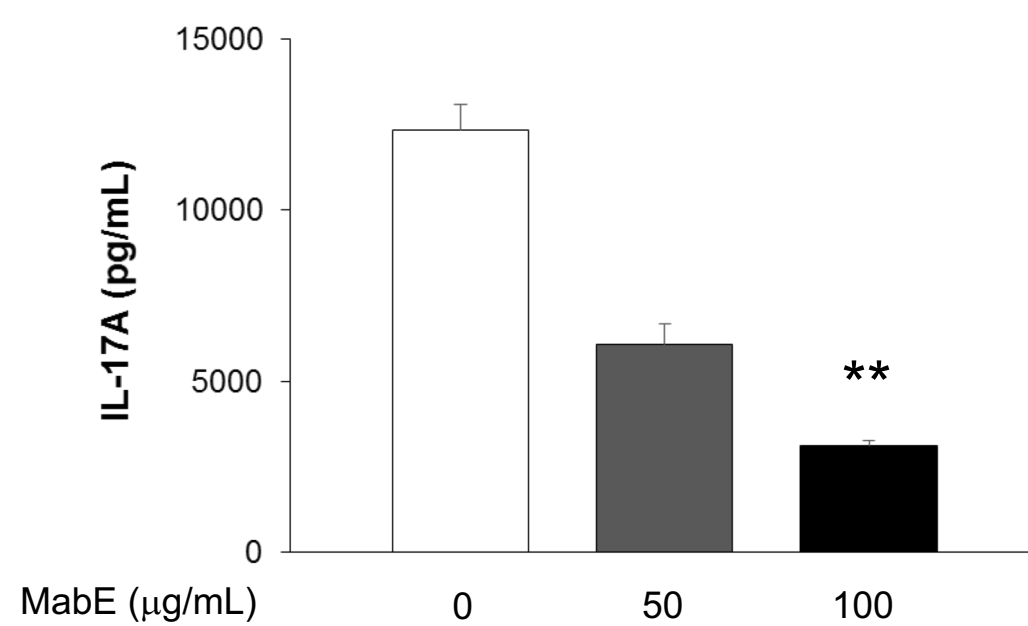

**Supplementary Figure 3.**

**MabE directly suppresses IL-17A production from splenocytes stimulated with PMA/ionomycin**

Naïve Balb/c splenocytes were incubated with or without MabE (50 or 100 mg/mL) for 1 hour, and then stimulated with PMA (10 ng/mL) and ionomycin (500 ng/mL) for 24 hours. The cell-free culture supernatants were collected and the IL-17A concentration was measured by ELISA. Data are presented as the mean  $\pm$  SEM.

\*\*p<0.01. The presented data are representative of three independent experiments.
