# Supplementary material for: Anti-inflammatory effects of Morus alba Linne bark on the activation of toll-like receptors and imiquimod-induced ear edema in mice
Source: PubMed Central journal article supplement (PMC8033707; doi:10.1186/s12906-021-03291-5), 2021-04-09
Supplement: 12906_2021_3291_MOESM3_ESM.pdf [file 12906_2021_3291_MOESM3_ESM.pdf]

Control

IMQ

IMQ+MabE

$\gamma\delta$ TCR

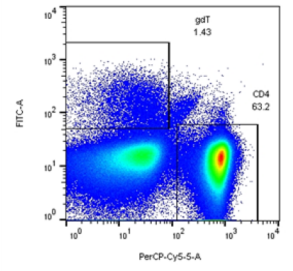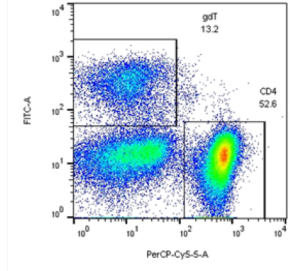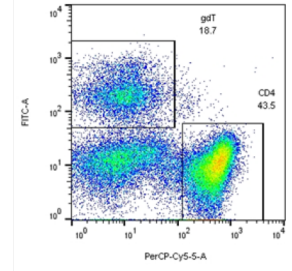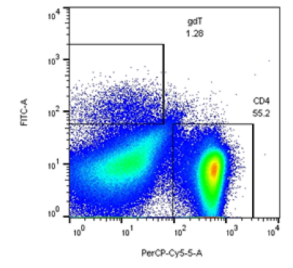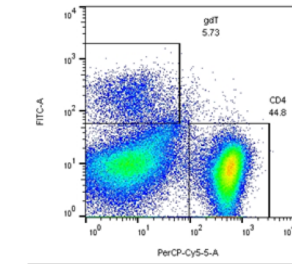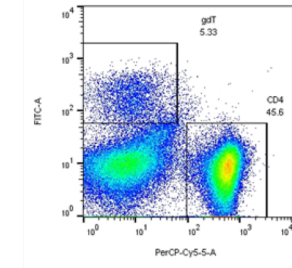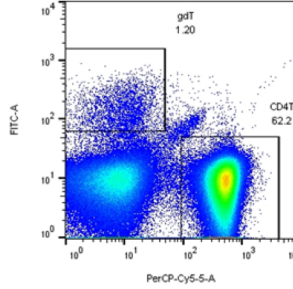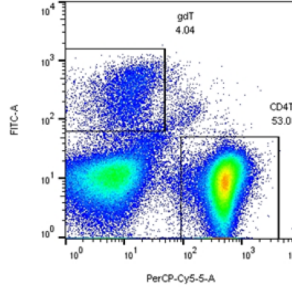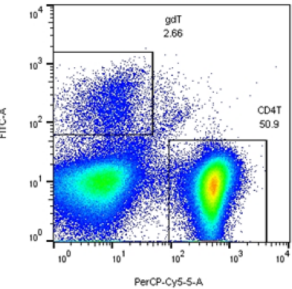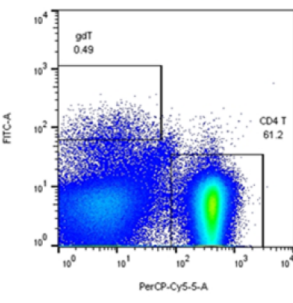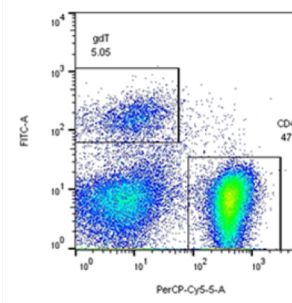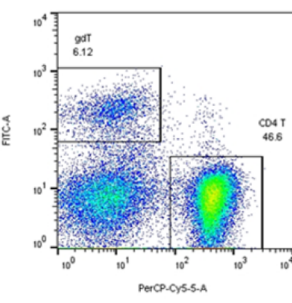

CD3
